# Supplementary material
Source: Springer Nature journal article supplement (https://www.springermedizin.de/resource/supplementary/12947_2004_33_MOESM5_ESM.pdf/9556040)

**a** Intracellular TNF- $\alpha$  (Monocytes)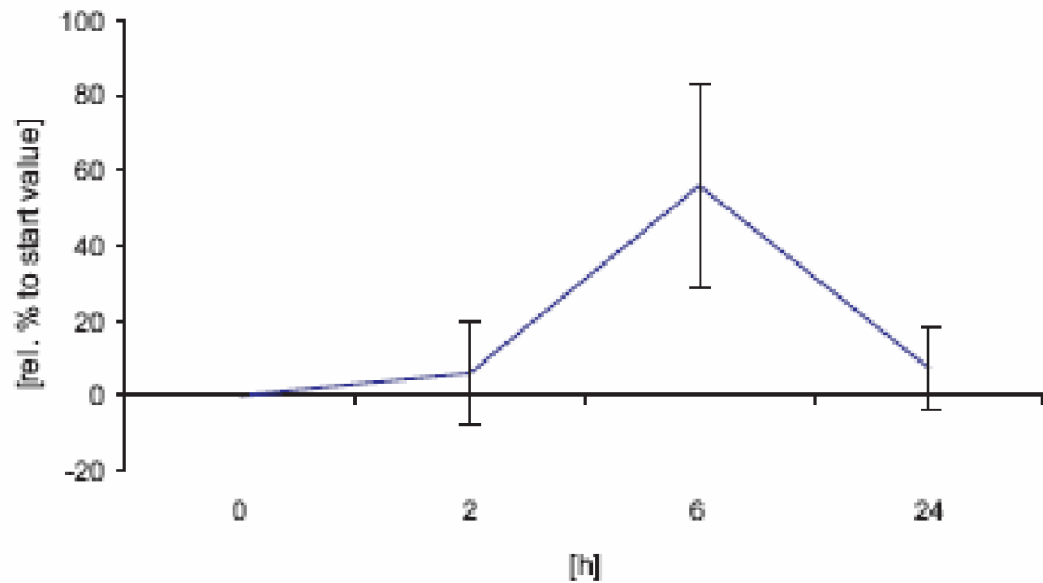**b** Specific Antibody Serum Levels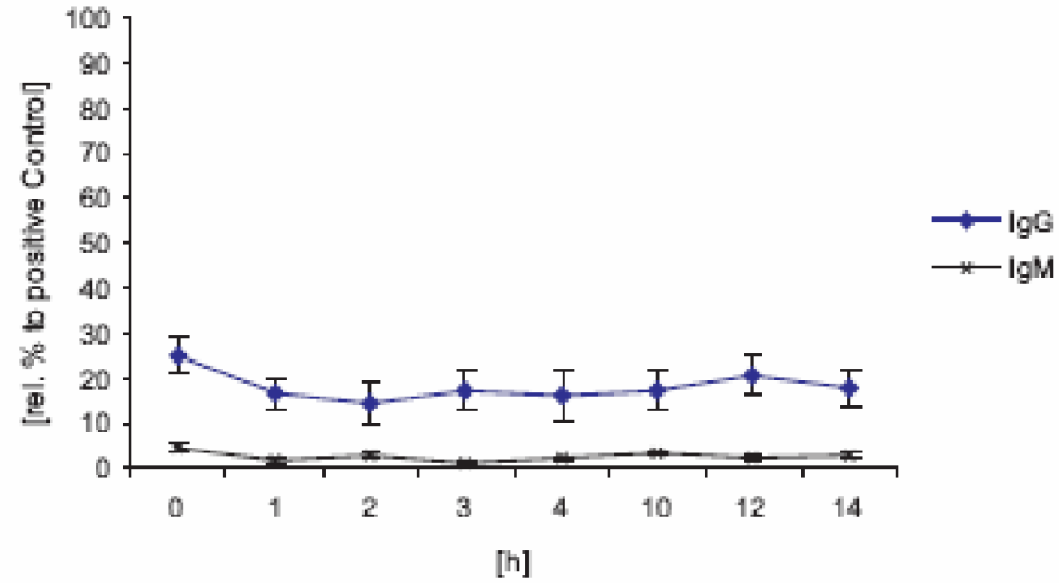

Supplement: MOESM5 [file 9556040]
